# Supplementary material for: Optimizing Sputter Deposition Conditions of Silver Thin Films Used in Low-Emissivity Coatings in an In-Line Deposition System
Source: MDPI journal article supplement (doi:10.3390/coatings13091556), 2023-09-06
Supplement: s1 [file s1]

## Supplementary Material

# Optimizing Sputter Deposition Conditions of Silver Thin Films Used in Low-Emissivity Coatings in an In-line Deposition System

Clàudia Campos, Natalia Herguedas and Enrique Carretero \*

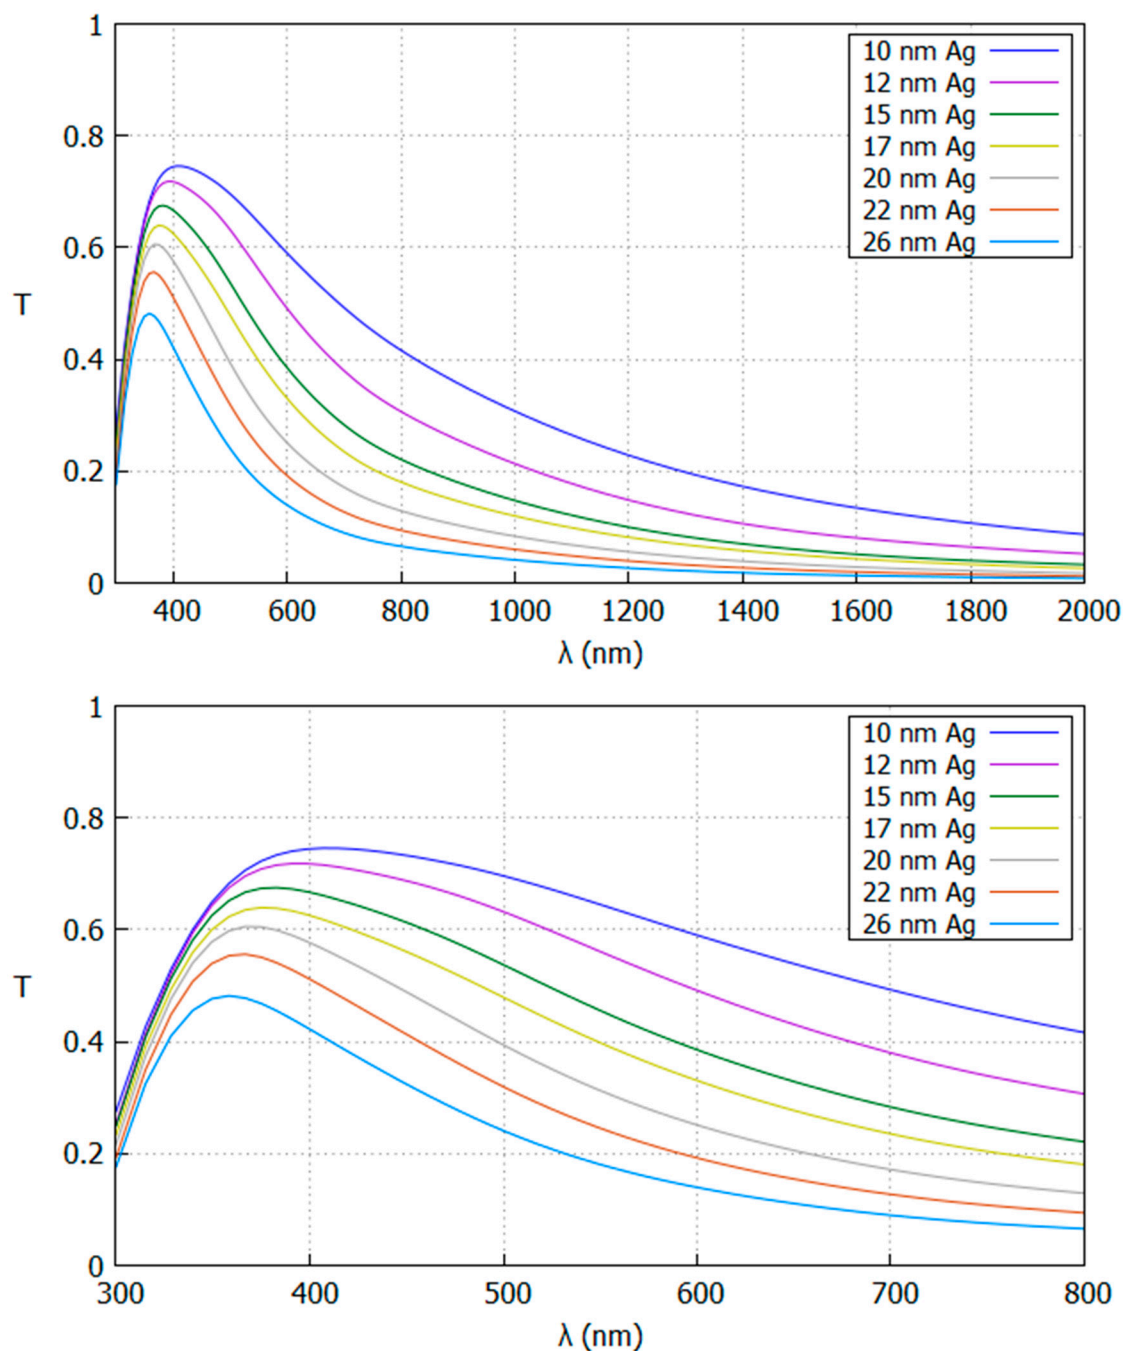

**Figure S1:** Transmittance spectrum of the AZO (10 nm)/Ag/AZO (10 nm) multilayer for different silver layer thicknesses deposited at 200 W and 300 sccm: between 300 and 2000 nm (top) and between 300 and 800 nm (bottom).
